# Supplementary material for: Arabidopsis ZUOTIN RELATED FACTOR1 Proteins Are Required for Proper Embryonic and Post-Embryonic Root Development
Source: Front Plant Sci. 2019 Nov 22;10:1498. doi: 10.3389/fpls.2019.01498 (PMC6882920; doi:10.3389/fpls.2019.01498)
Supplement: Table S1 — List of primers used in this study. [file Table_1.xlsx]

## Sheet: Sheet1
Table S1. List of primers used in this study.
Gene name	Forward primer （5’→3’）	Reverse primer （5’→3’）	Product size (bp)
WOX5	CCAAGGTGGACAAAATGAGAG	ATGATGAGTATGGAGAAAACG	93
ACR4	AATGGGAAACCCGAGCAGTGAG	TGTGCATTCTGCTGCTCCCAAG	71
CLV1	AATGATGTGTGTGGAGGAAGA	CGGATTTAGGAGGGTTAGTGA	83
CRN	ACCCGACCCACCCGTTCTGC	ATGCTTCTCGTGCTTCCCCA	96
CLV2	ACCCTACTGAACCTATCGCACAAC	ACTTCCCGAGCCCTTCTTTCTC	67
CLE40	GCGGCGATGAAATACAAAGGAAGC	GTGAGCAAGTAGTGAGGACGAAAG	75
RBR1	AAAGCCGCTGCTGGTGGAGC	CACCTTTGGCGATCCGGGACA	97
PLT1	AGCACTGAGGAAGAAGCAGCAGA	CCGGTTGATCTCGAAGTTGGTCAC	90
PLT2	GGCCGAGTTGCTGGAAACAAAGAT	TGCTTCTTCCTCCGTGCTGAATG	60
FEZ	TCAACACAACCCTCTCTCCA	TTCTTTTTCACCCGTCATCG	100
SMB	ACGATAATAACGATCAGGCTG	CCAAGTAGTGAAACGGAAACC	93
SCZ	ACCATTACTGGTGCGACGACTC	GCCGCCGTGTCAATTTGTTGTG	70
CYCD1;1	TCCGTCGCATGGATTCTCAAGG	ATTGGCCAACCACTCGTTTCCG	128
CYCD3;3	ACCACAGTCCAAGCAAGAAAA	TGAATGACGCATCAAACACAC	81
CYCD6;1	GCCTCAAGTCCTCTGCTTTT	GATGGGTCGTCGAATTTTCT	88
FZR2	CATCTGGTGGAAACGACAATAGGC	AGCCCATGAACATGAGGAGACC	124
ERF115	GCTCCTCCAACTCAAGATCAAGGG	TTTGCGGATCCCGAATTTCAGC	103
FZR1	TCATTTTGGACTTCTTGCTTC	CACACCTGGCTGTTGGTATCT	111
CYCA2;3	TCTTGGGAGATCAGCTTCTACAGC	GGCATAGAGGCAGCACAGTAAAGG	127
UPB1	TCATGATCCGACCAAGGAAGAGTG	TCTGTGTATTGCGCGACAAGGTC	62
CO2	AATTGTGAGGCCACCGCCAATC	GTAACCGGCGGTGGTTGAATTG	69
IAA14	CAGCTCCTTTACCATGGGGAG	ACCAACGAGCATCCAGTCAC	139
IAA16	TGGGATGGCCACCGGTACGA	CACGGTGGCACATGCGGAGG	140
IAA19	CGTGGCATCGGTGTGGCCTT	GCTGCAGCCCAAACCCGGTA	175
IAA28	GCTCCTCCTTGTCACCAATTCACT	ACTGGAGCTACCTCAACCCTGTTA	113
IAA29	TGTGCGATCGAGGGTGCTGC	CGTCTTCCTCGTTGGGCTGGC	145
IAA30	GAGACTCGGGCTCAGCTTCGGA	CTCTGCCGCACCGACTCCAT	88
IAA34	GCAGCGATCCTCCCCATCCCT	ACGCCACCAAACTCCGTGGTC	172
PIN1	GCAACAAAACGACGCAGGCT	TGAAGGAAATGAGGGACCAG	144
PIN2	TAGGAGGACAAAACAAGGAG	CGTGAGGAGGAATAGAAACT	144
PIN4	TGATAATGGTGTGGAGAAAGC	TCTGAGAGTATGGAGATGGAT	139
PIN7	GGAAACTCATAAGAAACCCA	CATCCCACCTGAAAGCAACA	78
EXP	GAGCTGAAGTGGCTTCCATGA	GGTCCGACATACCCATGATCC	81
PP2A	TAACGTGGCCAAAATGATGC	GTTCTCCACAACCGCTTGGT	61
