# Supplementary material for: Arabidopsis ZUOTIN RELATED FACTOR1 Proteins Are Required for Proper Embryonic and Post-Embryonic Root Development
Source: Front Plant Sci. 2019 Nov 22;10:1498. doi: 10.3389/fpls.2019.01498 (PMC6882920; doi:10.3389/fpls.2019.01498)
Supplement: Table S2 — Relative expression levels of some RAM-regulating genes in atzrf1a;b compared with WT. [file Table_2.xlsx]

## Sheet: S2
Table S2. Relative expression levels of some RAM-regulating genes in atzrf1a;b compared with WT.
		atzrf1a;b/WT
Gene Name	Repeat_1	Repeat_2	Repeat_3
WOX5	1.6286	1.3691	1.507
CO2	0.1225	0.2193	0.1697
ACR4	0.5867	0.5251	0.5512
CLV1	0.1873	0.1388	0.2624
CLV2	0.6849	0.5659	0.6302
CRN	0.3196	0.4845	0.4113
CLE40	1.0216	1.4957	1.4447
ERF115	20.4985	16.5349	23.062
CYCD1;1	0.6029	0.5912	0.598
CYCD3;3	1.1736	0.8438	1.0082
CYCD6;1	1.0748	0.7392	0.8089
RBR	1.0495	1.2139	1.094
CYCA2;3	0.895	0.7526	0.727
CCS52A2	0.5625	0.7219	0.727
CCS52A1	2.5373	2.5727	2.3027
PLT1	1.2151	1.1338	0.8474
PLT2	1.4649	1.1414	1.4447
FEZ	0.5277	0.806	0.6712
SMB	0.5468	0.7896	0.7627
SCZ	0.9791	1.3376	0.9199
UPB1	2.0786	2.3548	2.137
