# Supplementary material for: Arabidopsis ZUOTIN RELATED FACTOR1 Proteins Are Required for Proper Embryonic and Post-Embryonic Root Development
Source: Front Plant Sci. 2019 Nov 22;10:1498. doi: 10.3389/fpls.2019.01498 (PMC6882920; doi:10.3389/fpls.2019.01498)
Supplement: Table S3 — Relative expression levels of auxin-responsive genes in atzrf1a;b compared with WT. [file Table_3.xlsx]

## Sheet: S3
Table S3. Relative expression levels of auxin-responsive genes in atzrf1a;b compared with WT.
		atzrf1a;b/WT
Gene Name	Repeat_1	Repeat_2	Repeat_3
IAA14	1.4783	1.499	1.4886
IAA16	0.9958	1.0238	1.0097
IAA19	1.2825	1.2737	1.2781
IAA28	0.6281	0.582	0.6046
IAA29	0.5191	0.9686	0.7091
IAA30	0.8699	1.0132	0.9389
IAA34	1.1165	0.7521	0.9163
PIN1	0.9909	0.9055	0.9055
PIN2	1.7902	1.6474	1.7413
PIN4	0.2102	0.2221	0.2002
PIN7	0.235	0.259	0.2239
